# Supplementary material for: From crystal to crystal: a new polymorph of (4-carboxylatopyridine)silver(i) by topotactic dehydration of its monohydrate
Source: Royal Society of Chemistry journal article supplement (doi:10.1039/c0nj00144a), 2010-01-01

## Supporting information to the manuscript

# From crystal to crystal: A new polymorph of (4-carboxylato-pyridine)silver(I) by topotactic dehydration of its monohydrate.

Irmgard Kalf, Patrick Mathieu and Ulli Englert\*

IR spectra of silver isonicotinate a) as synthesized (**1**), b) after storage for one month over saturated NaCl solution (**1**), and c) after drying under vacuum for 12 hrs (**2 $\alpha$** )

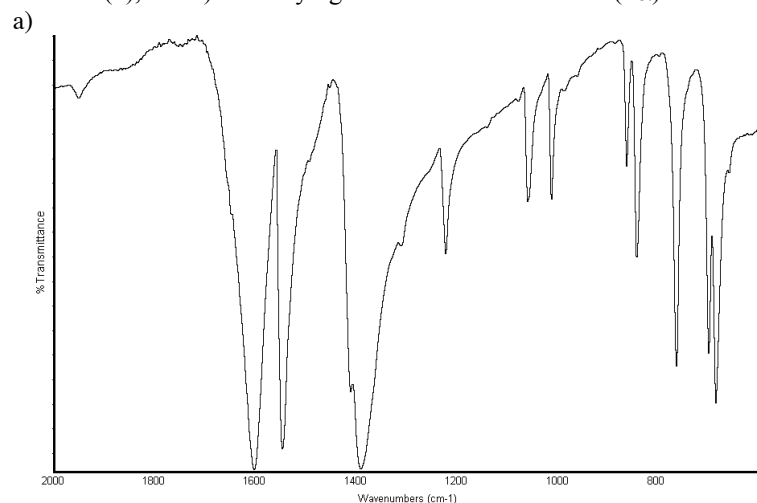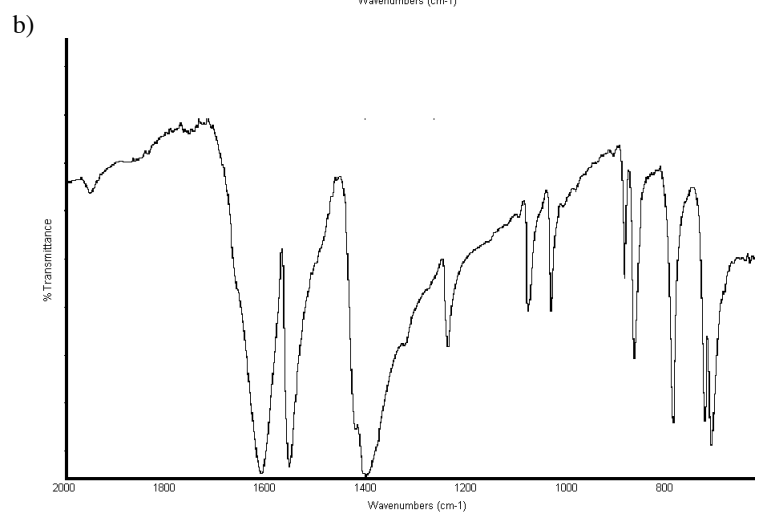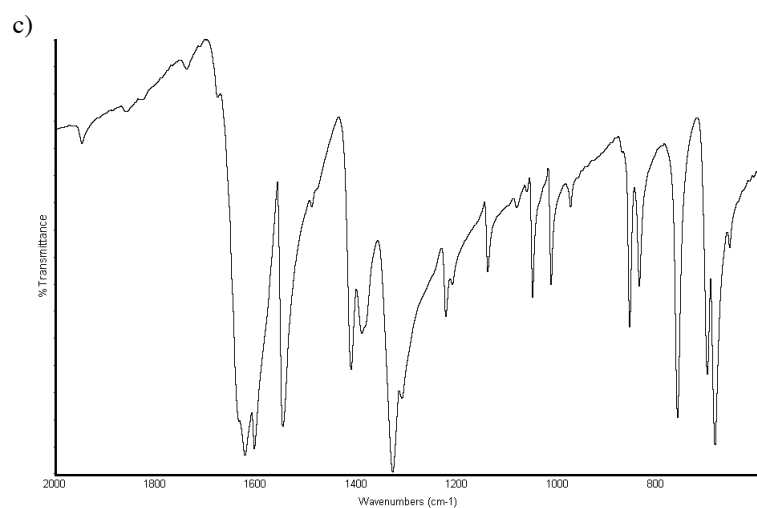

Powder diffractograms of (**1**) as synthesized (a) and of **2 $\alpha$**  obtained by drying **1** under vacuum for 12 hrs (b)

a)

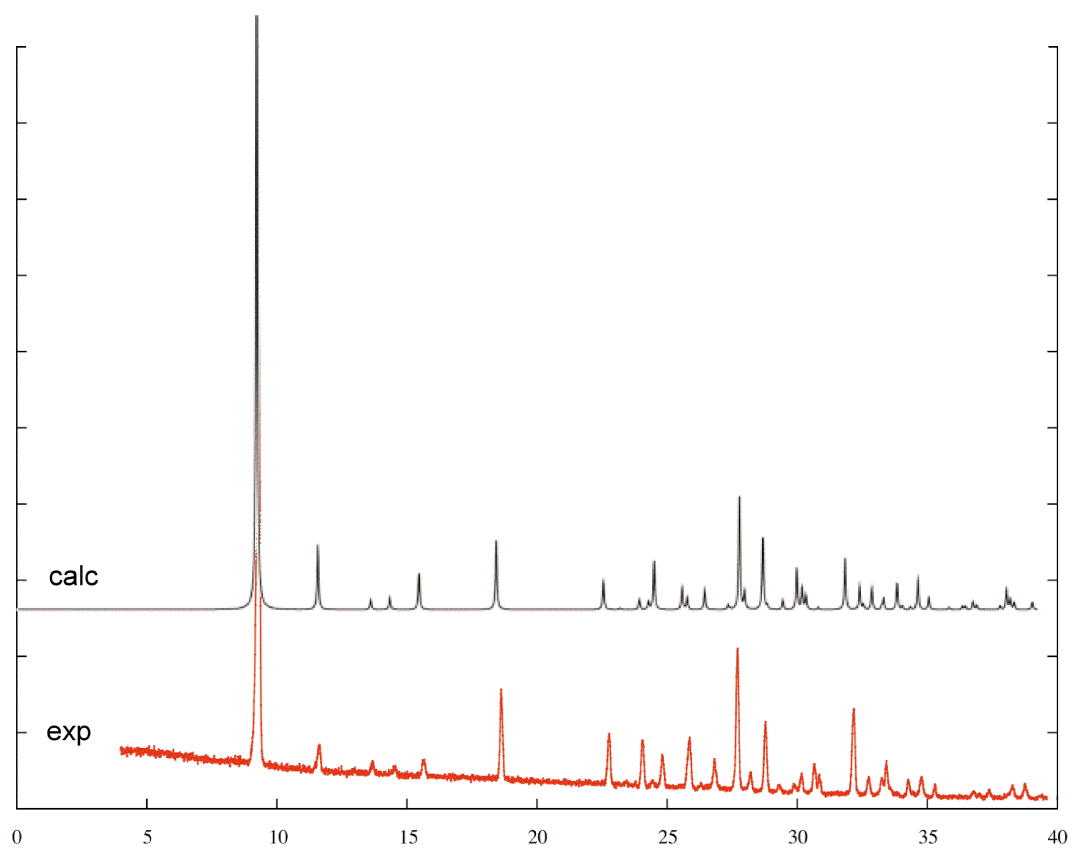

b)

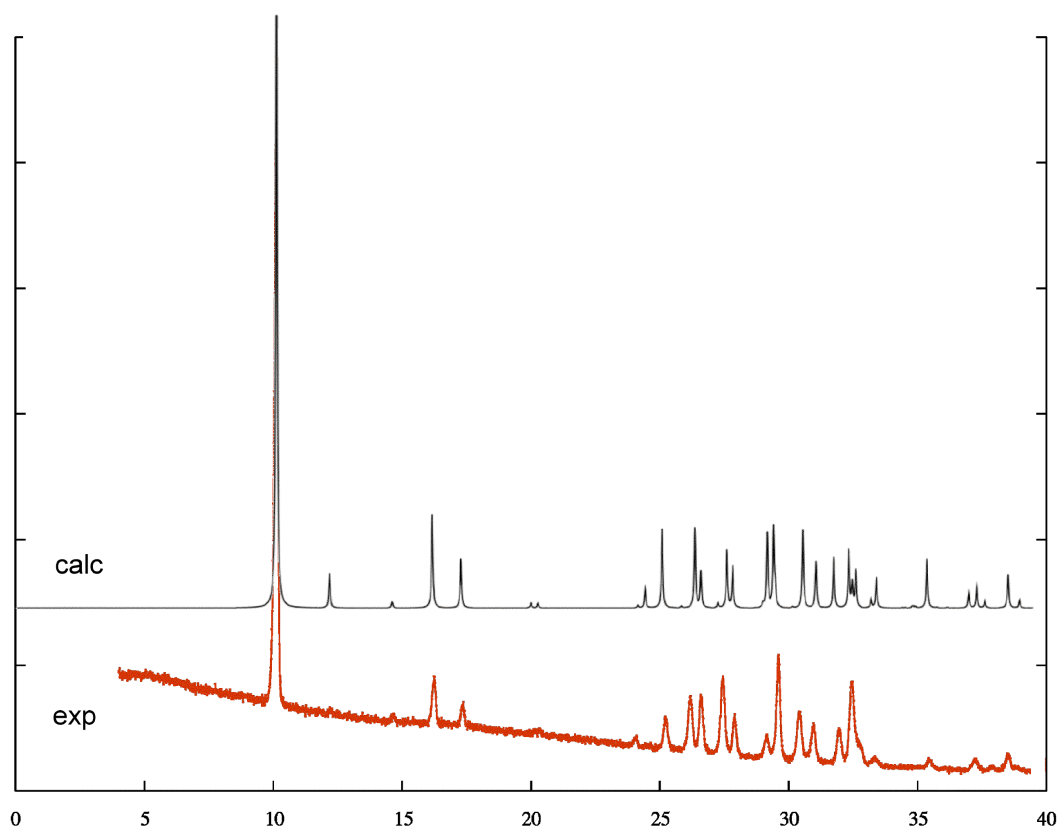

Projection of the unit cell of **1** along [010]; the hydrate water molecules have been removed from the crystal structure, and the resulting channels extending along [100] have been drawn as a sequence of red spheres with the help of the program PLATON (A. L. Spek, *Acta Crystallogr. Sect. D*, 2009, **65**, 148). Hydrogen atoms have been omitted.

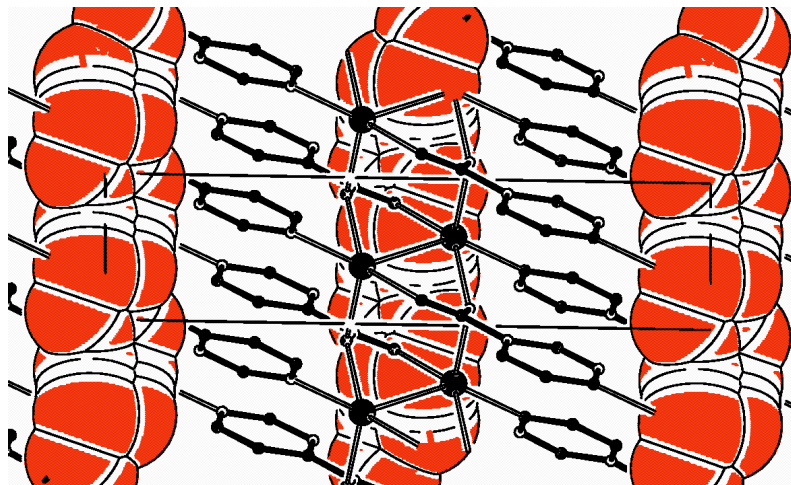

Supplement: c0nj00144a.pdf [file c0nj00144a.pdf]
